# Supplementary material
Source: PubMed Central journal article supplement (PMC3551860)
Supplement: rna-9-1054-s01.pdf [file rna-9-1054-s01.pdf]

Supplemental Material to: Morten Venø, Jesper Bramsen, Christian Bendixen, Frank Panitz, Ida Holm, Marie Öhman, et al. Spatio-temporal regulation of ADAR editing during development in porcine neural tissues. RNA Biology 2012; 9(8); DOI: 10.4161/rna.21082;  
<http://www.landesbioscience.com/journals/rnabiology/article/21082/>

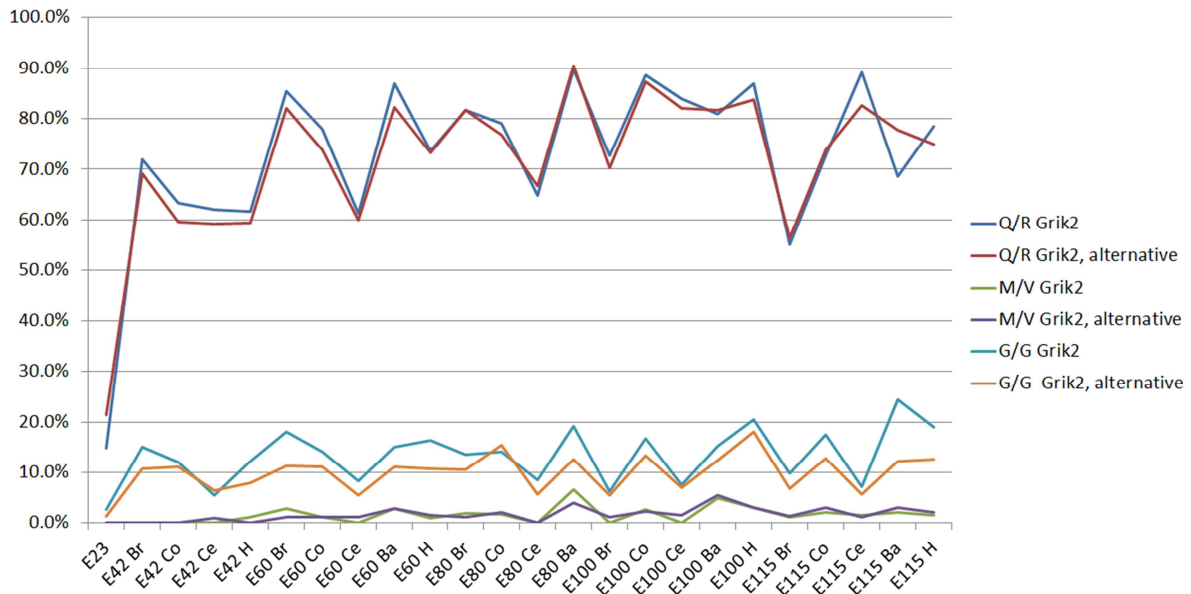

### Supplementary Figure S1

Q/R site, M/V site and G/G site editing percentages of the Grik2 amplicon used for analysis and an alternative Grik2 amplicon produced using a different set of primers. The two amplicons were sequenced in the same multiplexed 454 sequencing experiment. The I/V and Y/C sites of Grik2 were not contained in the region of the Grik2 mRNA amplified by the alternative primer set, therefore those sites are not included in this graph.

The editing percentages of the two separate Grik2 amplicons displayed here correlate well, attesting to the reliability of the technique used.

E23 = Forebrain, embryonic day 23. Br = Brain stem. Co = Cortex. Ce= Cerebellum. H = Hippocampus. Ba = Basal ganglia.

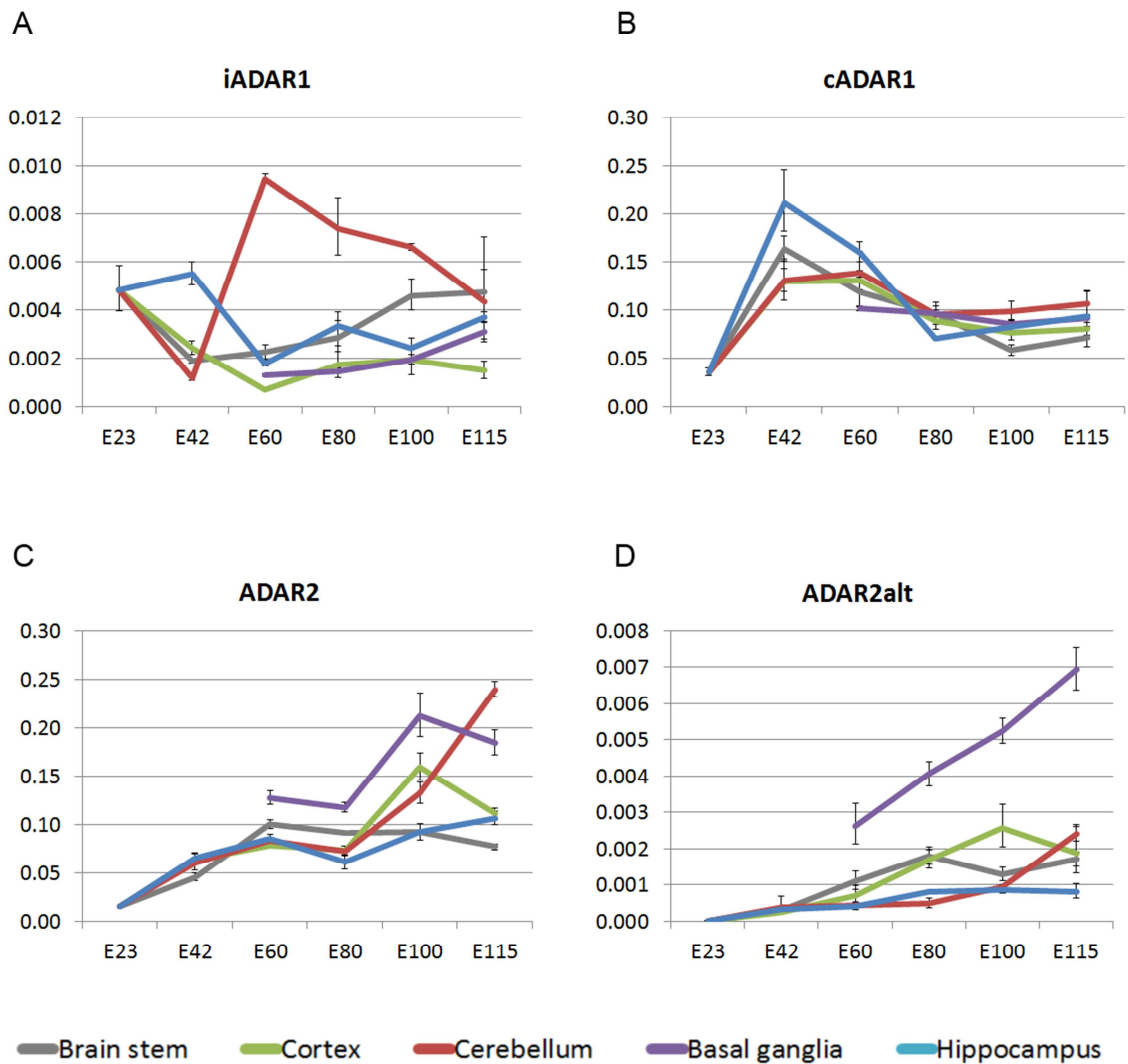

### Supplementary Figure S2

Transcript levels of various ADAR species were examined by RT-qPCR. Expression relative to GAPDH, is shown. The interferon inducible variant of ADAR1 (A) is expressed significantly less than the constitutively expressed ADAR1 (B). Increasing expression is clear for ADAR2 (C) and the alternatively spliced (non-functional) ADAR2 transcript (D). However, the alternatively spliced ADAR2 is expressed at a much lower level than the functional ADAR2.

Performed in triplicates, error bars represent standard deviation.

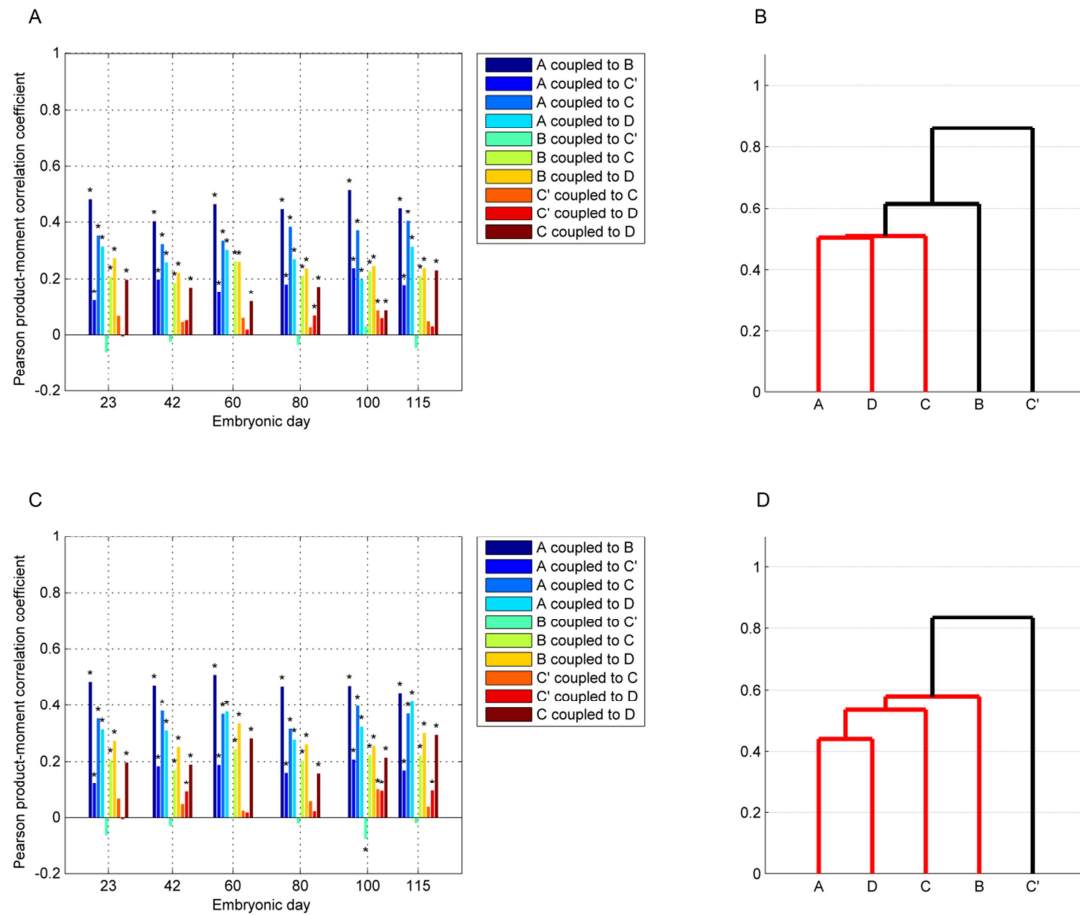

### Supplementary Figure S3

Pearson correlation coefficients for coupling between the editing sites on the Htr2c amplicon in Brain stem (A) and Cerebellum (C). See legend for color codes. Black asterisks denote significance compared to bonferroni corrected critical p-values. Group analysis of E115 Htr2c editing sites in Brain stem (B) and Cerebellum (D).

Note that only one tissue, whole forebrain, was dissected from E23.

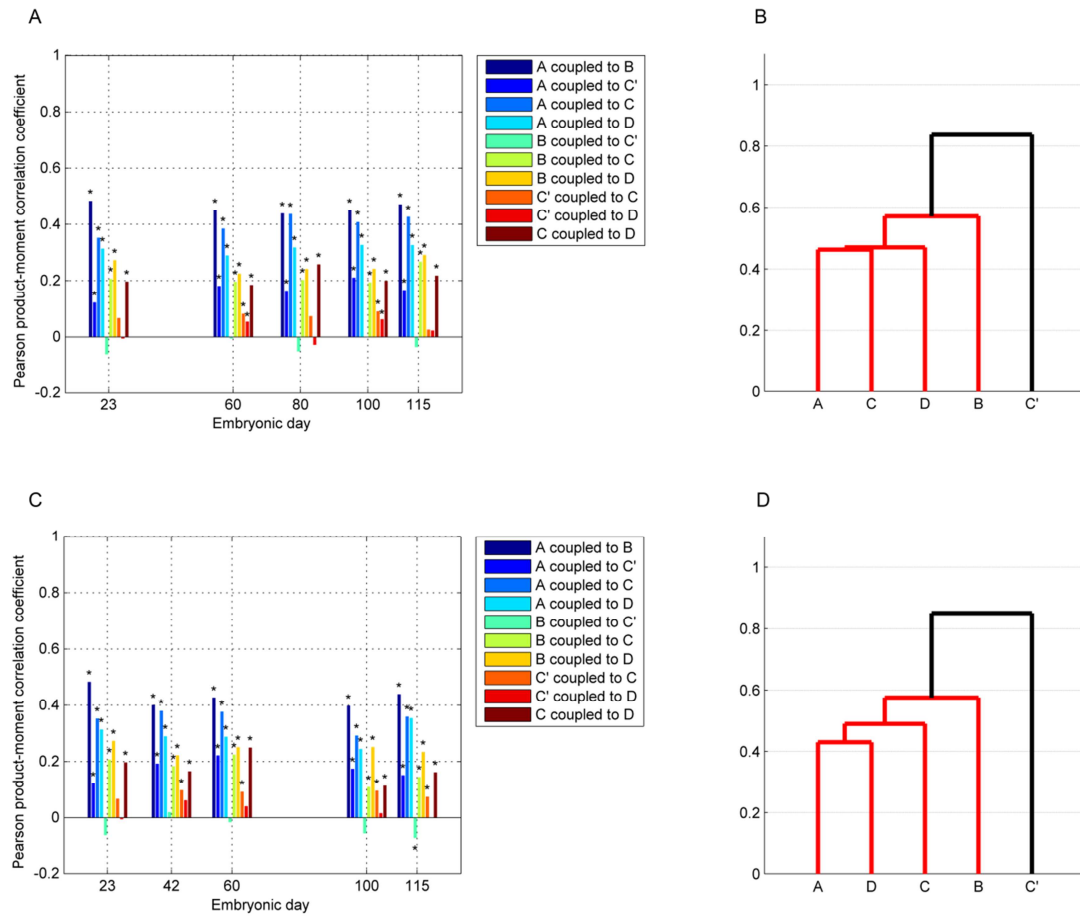

### Supplementary Figure S4

Pearson correlation coefficients for coupling between the editing sites on the Htr2c amplicon in Basal ganglia (A) and Hippocampus (C). See legend for color codes. Black asterisks denote significance compared to bonferroni corrected critical p-values. Group analysis of E115 Htr2c editing sites in Basal ganglia (B) and Hippocampus (D).

Note that only one tissue, whole forebrain, was dissected from E23.

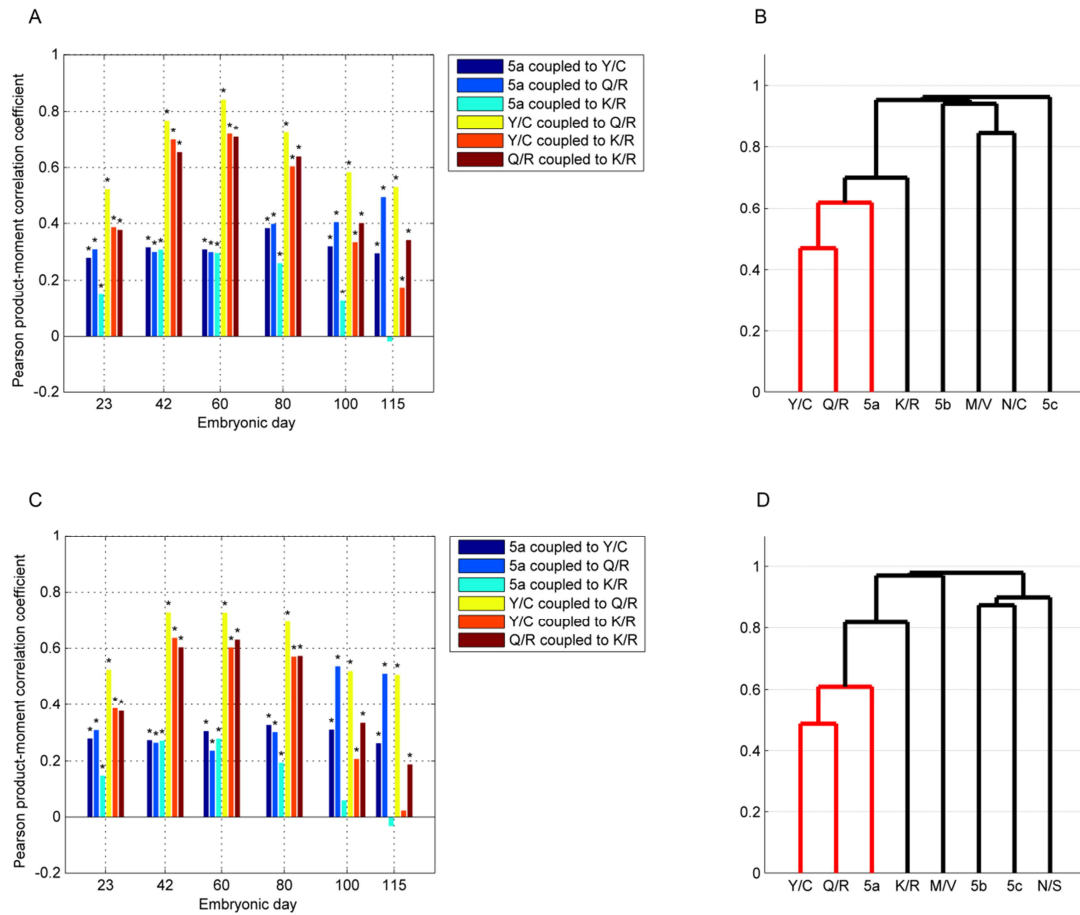

### Supplementary Figure S5

Pearson correlation coefficients for coupling between the main editing sites on the Blcap amplicon in Brain stem (A) and Cerebellum (C). See legend for color codes. Black asterisks denote significance compared to bonferroni corrected critical p-values. Group analysis of all E115 Blcap editing sites in Brain stem (B) and Cerebellum (D).

Note that only one tissue, whole forebrain, was dissected from E23.

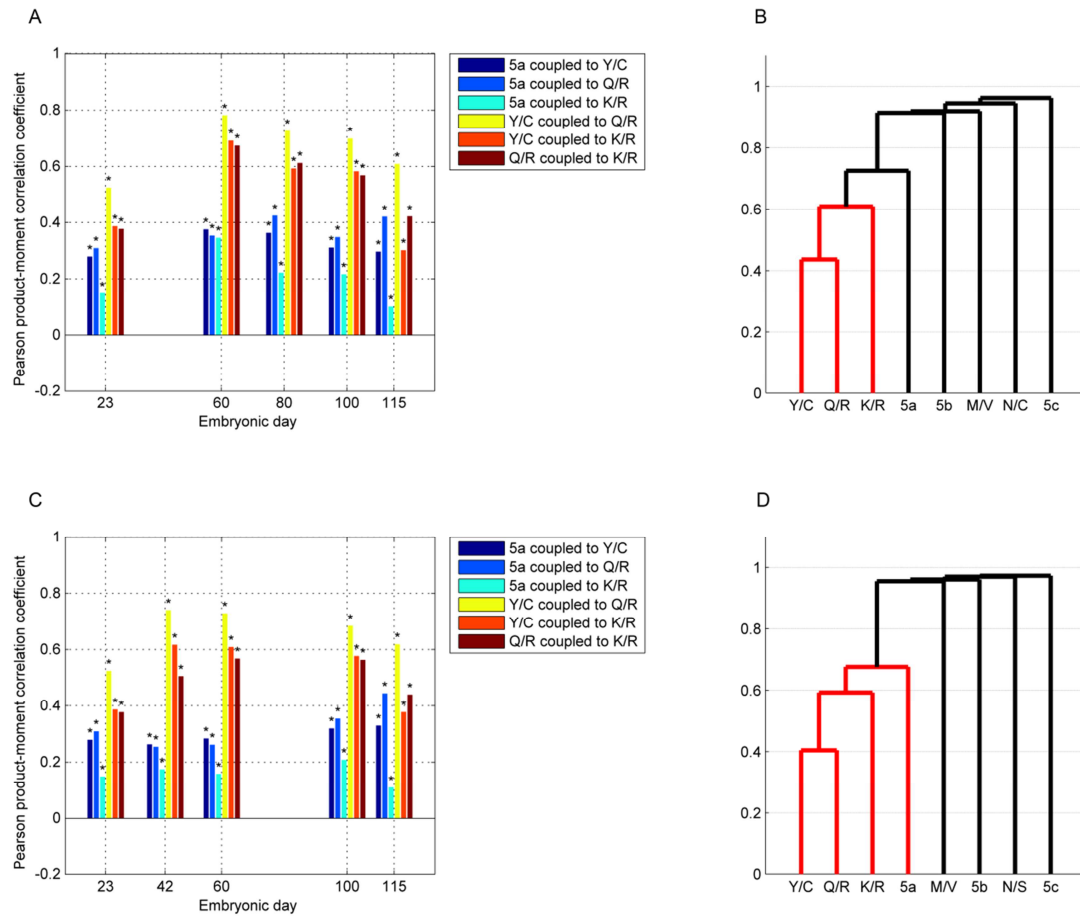

### Supplementary Figure S6

Pearson correlation coefficients for coupling between the main editing sites on the Bicap amplicon in Basal ganglia (A) and Hippocampus (C). See legend for color codes. Black asterisks denote significance compared to bonferroni corrected critical p-values. Group analysis of all E115 Bicap editing sites in Basal ganglia (B) and Hippocampus (D).

Note that only one tissue, whole forebrain, was dissected from E23.

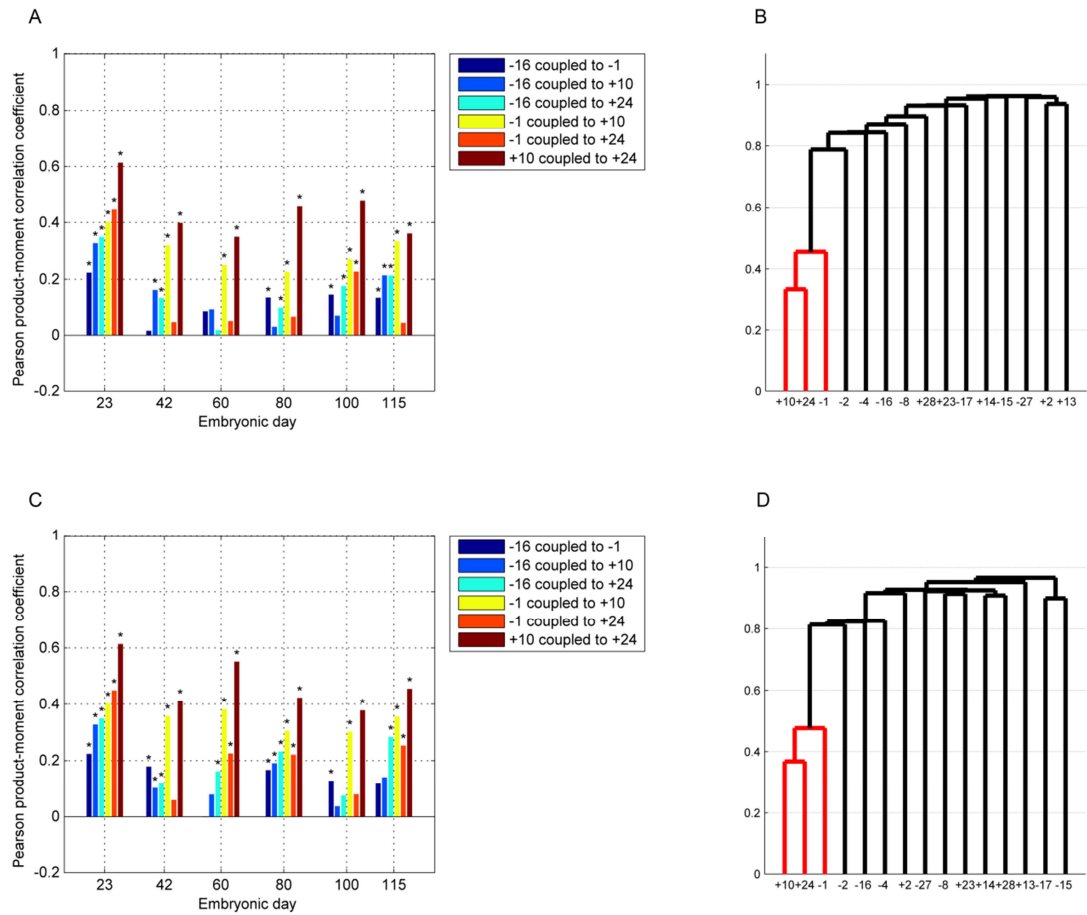

### Supplementary Figure S7

Pearson correlation coefficients for coupling between the predominant self-editing sites on the ADAR2 amplicon in Brain stem (A) and Cerebellum (C). See legend for color codes. Black asterisks denote significance compared to bonferroni corrected critical p-values. Group analysis of all E115 ADAR2 self-editing sites in Brain stem (B) and Cerebellum (D).

Note that only one tissue, whole forebrain, was dissected from E23.



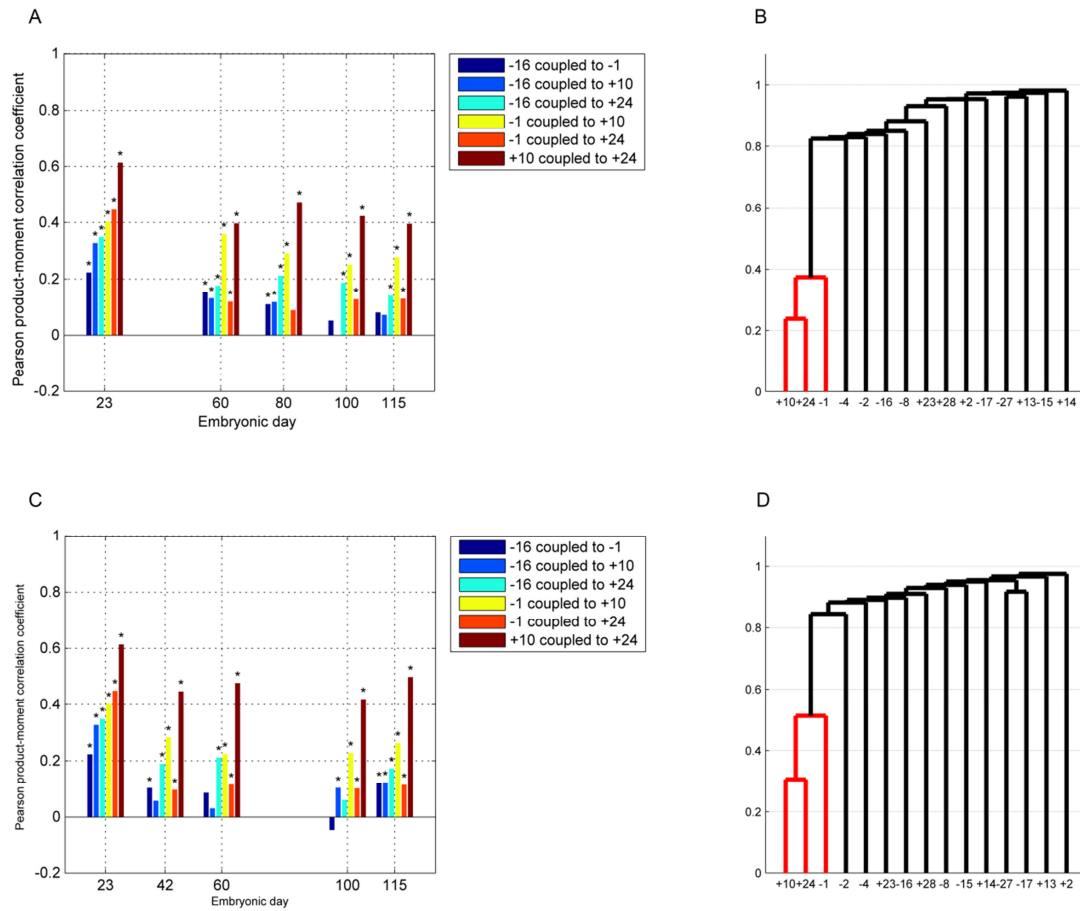

### Supplementary Figure S8

Pearson correlation coefficients for coupling between the predominant self-editing sites on the ADAR2 amplicon in Basal ganglia (A) and Hippocampus (C). See legend for color codes. Black asterisks denote significance compared to bonferroni corrected critical p-values. Group analysis of all E115 ADAR2 self-editing sites in Basal ganglia (B) and Hippocampus (D).

Note that only one tissue, whole forebrain, was dissected from E23.

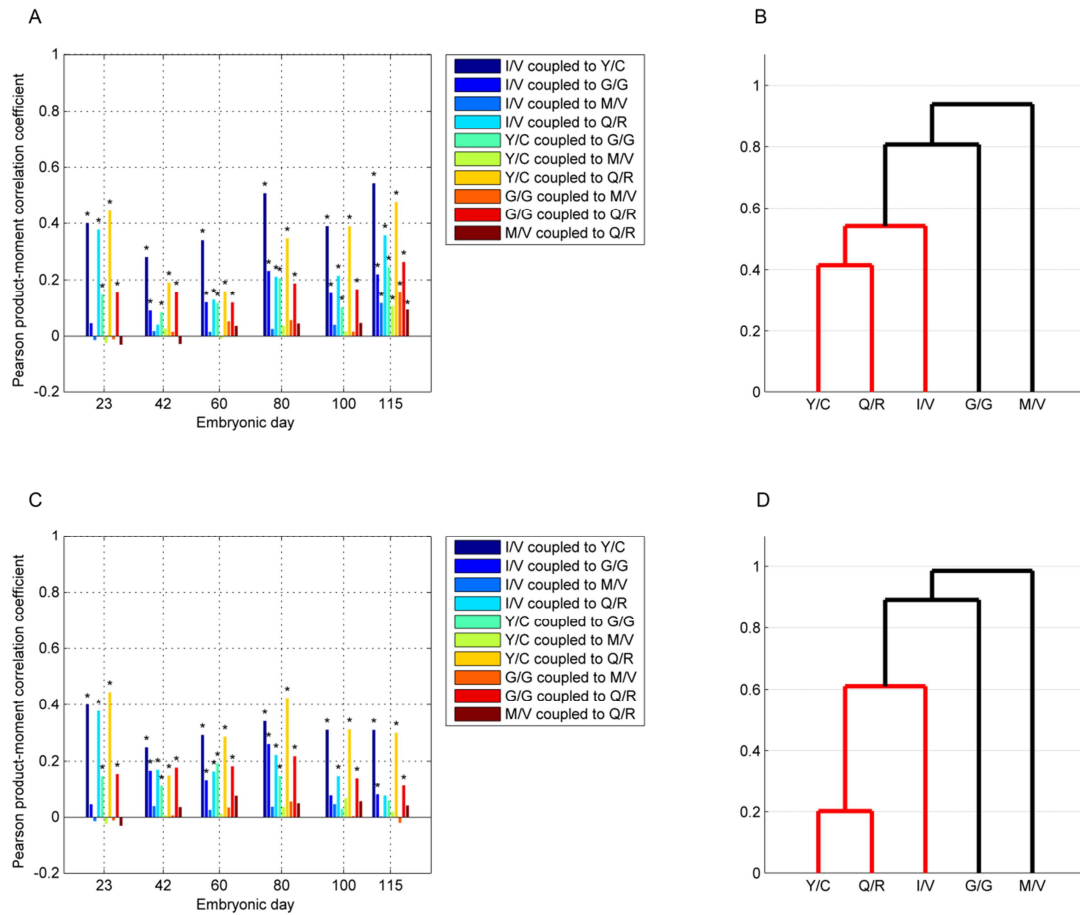

### Supplementary Figure S9

Pearson correlation coefficients for coupling between the editing sites on the Grik2 amplicon in Brain stem (A) and Cerebellum (C). See legend for color codes. Black asterisks denote significance compared to bonferroni corrected critical p-values. Group analysis of E115 Grik2 editing sites in Brain stem (B) and Cerebellum (D).

Note that only one tissue, whole forebrain, was dissected from E23.

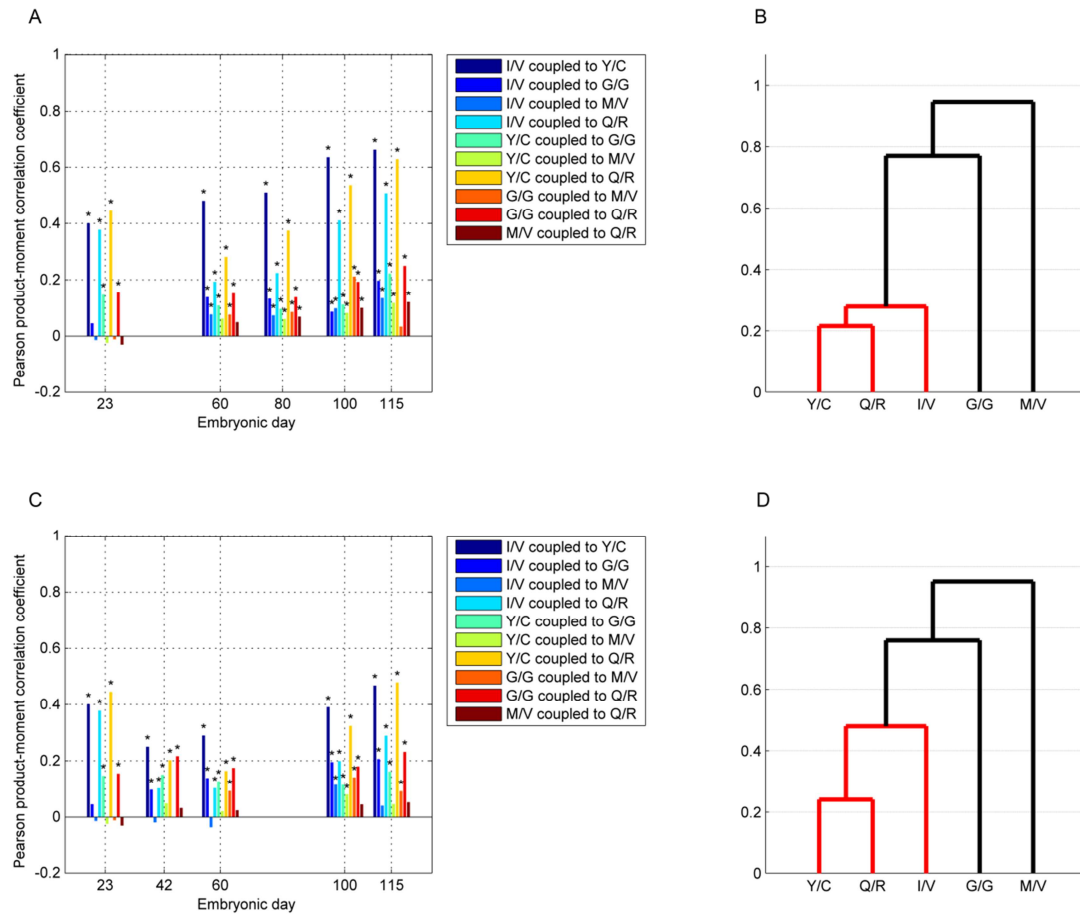

### Supplementary Figure S10

Pearson correlation coefficients for coupling between the editing sites on the Grik2 amplicon in Basal ganglia (A) and Hippocampus (C). See legend for color codes. Black asterisks denote significance compared to bonferroni corrected critical p-values. Group analysis of E115 Grik2 editing sites in Basal ganglia (B) and Hippocampus (D).

Note that only one tissue, whole forebrain, was dissected from E23.

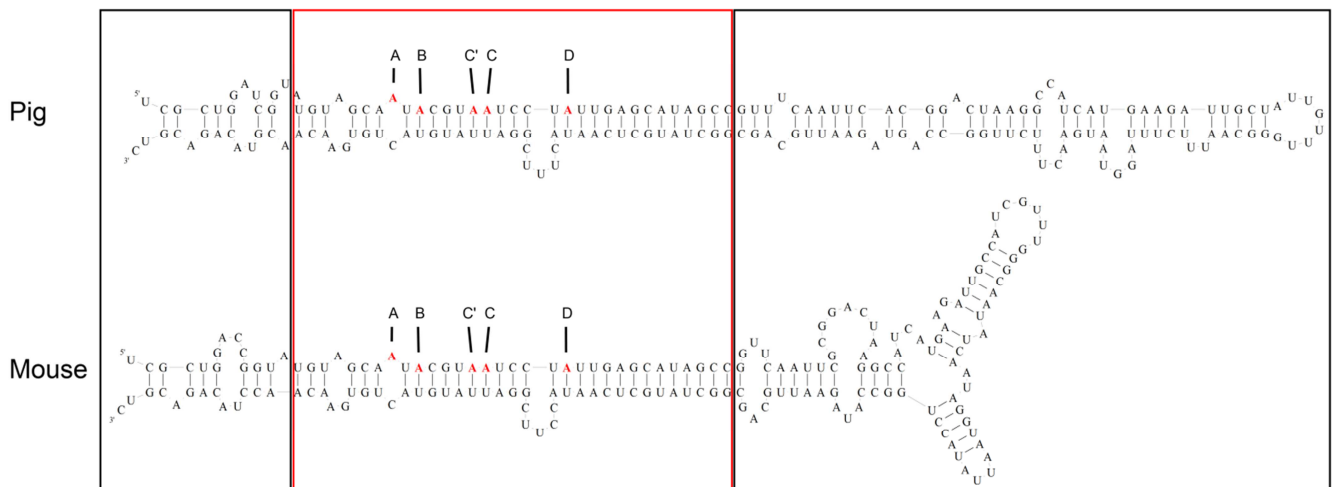

### Supplementary Figure S11

Secondary structure prediction of the edited region of the Htr2c pre-mRNA and the downstream sequence including the intronic editing complementary sequence from pig, genome Sscrofa9.2 (top) and mouse, genome mm9 (bottom). Editing sites (A, B, C', C, D) are indicated. Sequence and secondary structure are identical between pig and mouse in the region immediately surrounding the editing sites (red box), whereas differences are observed further away from the editing sites (black boxes). It could be speculated that the longer stem of the porcine Htr2c pre-mRNA could increase the binding affinity for ADAR enzymes, resulting in maximal RNA editing at developmental time points where low levels of ADAR enzymes are present such as embryonic day 23.

Secondary structure prediction was done using the UNAFold algorithm<sup>1</sup> implemented in the program "The RNA Folder", <http://www.ncrnalab.dk/rnafolder/>.

1. Markham NR, Zuker M. UNAFold: software for nucleic acid folding and hybridization. *Methods Mol Biol* 2008; 453:3-31.

| Gene   | Editing site  | Distance to principal site | Forebrain | Hippocampus |       |       |        |        | Cortex |        |        |        |       | Cerebellum |        |       |        |       | Brain stem |        |       |       |        | Basal ganglia |       |       |      |  |
|--------|---------------|----------------------------|-----------|-------------|-------|-------|--------|--------|--------|--------|--------|--------|-------|------------|--------|-------|--------|-------|------------|--------|-------|-------|--------|---------------|-------|-------|------|--|
|        |               |                            |           | E42         | E60   | E100  | E115   | E42    | E60    | E80    | E100   | E115   | E42   | E60        | E80    | E100  | E115   | E42   | E60        | E80    | E100  | E115  | E60    | E80           | E100  | E115  |      |  |
| Grik2  | I/V           | -163 (and 32kb intron)     | 3.7%      | 7.8%        | 13.3% | 39.0% | 38.2%  | 10.2%  | 17.7%  | 29.4%  | 41.0%  | 42.3%  | 9.3%  | 13.2%      | 14.2%  | 25.7% | 31.6%  | 12.5% | 21.6%      | 25.9%  | 29.5% | 22.4% | 35.0%  | 53.4%         | 62.7% | 49.9% |      |  |
|        | Y/C           | -150 (and 32kb intron)     | 10.3%     | 25.5%       | 42.5% | 75.6% | 71.1%  | 31.7%  | 48.7%  | 62.0%  | 78.4%  | 69.2%  | 32.5% | 45.3%      | 51.0%  | 74.3% | 81.6%  | 37.8% | 57.7%      | 55.4%  | 68.1% | 47.5% | 65.9%  | 79.1%         | 78.7% | 67.0% |      |  |
|        | G/G           | -17                        | 1.4%      | 8.0%        | 10.8% | 18.0% | 12.6%  | 11.1%  | 11.1%  | 15.5%  | 13.3%  | 12.8%  | 6.4%  | 5.6%       | 5.8%   | 7.1%  | 5.7%   | 10.8% | 11.3%      | 10.6%  | 5.5%  | 6.9%  | 11.1%  | 12.6%         | 12.4% | 12.3% |      |  |
|        | M/V           | -4                         | 1.6%      | 3.0%        | 2.2%  | 1.6%  | 1.6%   | 1.2%   | 1.2%   | 2.1%   | 2.4%   | 3.1%   | 1.1%  | 1.2%       | 1.1%   | 1.7%  | 1.2%   | 1.3%  | 1.1%       | 1.3%   | 1.4%  | 2.8%  | 4.0%   | 5.5%          | 3.1%  | 1.5%  |      |  |
|        | Q/R           | 0                          | 14.9%     | 61.6%       | 73.7% | 86.9% | 78.6%  | 63.3%  | 77.9%  | 79.1%  | 88.7%  | 72.8%  | 62.0% | 61.2%      | 64.9%  | 83.9% | 89.2%  | 71.9% | 85.5%      | 81.6%  | 72.7% | 55.1% | 87.0%  | 89.8%         | 80.9% | 68.5% |      |  |
| Gria2  | -86           | -86                        | 2.6%      | 11.8%       | 3.3%  | 7.1%  | 2.9%   | 7.1%   | 2.5%   | 1.9%   | 4.3%   | 6.6%   | 3.5%  | 6.0%       | 1.9%   | 4.2%  | 6.6%   | 3.5%  | 6.0%       | 1.9%   | 4.2%  | 6.6%  | 3.5%   | 6.0%          | 1.9%  | 4.2%  |      |  |
|        | -54           | -84                        | 14.3%     | 2.2%        | 4.6%  | 3.4%  | 100.0% | 100.0% | 100.0% | 97.2%  | 98.0%  | 100.0% | 98.6% | 100.0%     | 98.3%  | 98.2% | 99.1%  | 93.8% | 96.5%      | 100.0% | 98.9% | 93.8% | 96.5%  | 100.0%        | 98.9% | 93.8% |      |  |
|        | Q/R           | 0                          | 93.6%     | 97.6%       | 96.3% | 99.2% | 93.7%  | 94.7%  | 95.7%  | 100.0% | 100.0% | 100.0% | 97.2% | 98.0%      | 100.0% | 98.6% | 100.0% | 98.3% | 98.2%      | 99.1%  | 93.8% | 96.5% | 100.0% | 98.9%         | 93.8% | 96.5% |      |  |
|        | +4            | 4                          | 7.1%      | 3.4%        | 6.8%  | 16.7% | 5.9%   | 3.8%   | 6.1%   | 15.0%  | 7.0%   | 2.9%   | 1.7%  | 11.2%      | 5.6%   | 5.0%  | 20.8%  | 5.8%  | 8.7%       | 8.3%   | 5.9%  | 6.8%  | 8.2%   | 12.3%         | 1.5%  | 1.5%  |      |  |
|        | +45           | 45                         | 3.7%      | 1.4%        | 3.7%  | 1.4%  | 3.7%   | 1.4%   | 3.7%   | 1.4%   | 3.7%   | 1.4%   | 3.7%  | 1.4%       | 3.7%   | 1.4%  | 3.7%   | 1.4%  | 3.7%       | 1.4%   | 3.7%  | 1.4%  | 3.7%   | 1.4%          | 3.7%  | 1.4%  | 3.7% |  |
| Gria3  | Hotspot (+60) | 60                         | 17.1%     | 52.1%       | 49.4% | 60.0% | 54.6%  | 56.0%  | 49.2%  | 60.0%  | 65.5%  | 70.3%  | 39.1% | 52.3%      | 61.6%  | 73.0% | 64.5%  | 56.0% | 50.0%      | 62.8%  | 71.0% | 67.6% | 70.4%  | 51.4%         | 81.2% | 73.6% |      |  |
|        | -37           | -37                        | 1.1%      | 1.4%        | 1.1%  | 1.1%  | 1.1%   | 1.1%   | 1.1%   | 1.1%   | 1.1%   | 1.1%   | 1.1%  | 1.1%       | 1.1%   | 1.1%  | 1.1%   | 1.1%  | 1.1%       | 1.1%   | 1.1%  | 1.1%  | 1.1%   | 1.1%          | 1.1%  | 1.1%  |      |  |
|        | -1            | -1                         | 3.2%      | 3.1%        | 1.3%  | 1.8%  | 2.6%   | 3.3%   | 2.1%   | 2.4%   | 3.3%   | 1.9%   | 2.4%  | 2.6%       | 2.9%   | 3.7%  | 2.4%   | 2.5%  | 2.4%       | 2.0%   | 2.3%  | 2.0%  | 2.0%   | 3.2%          | 2.1%  | 2.8%  |      |  |
|        | R/G           | 0                          | 35.7%     | 32.8%       | 25.2% | 36.2% | 44.2%  | 35.6%  | 26.2%  | 42.3%  | 36.5%  | 45.6%  | 31.7% | 35.2%      | 41.4%  | 37.9% | 36.4%  | 33.3% | 45.0%      | 33.2%  | 36.8% | 28.9% | 26.9%  | 36.4%         | 35.2% | 34.2% |      |  |
|        | +11           | 11                         | 1.8%      | 1.7%        | 1.1%  | 1.1%  | 1.1%   | 1.1%   | 1.1%   | 1.1%   | 1.1%   | 1.1%   | 1.1%  | 1.1%       | 1.1%   | 1.1%  | 1.1%   | 1.1%  | 1.1%       | 1.1%   | 1.1%  | 1.1%  | 1.1%   | 1.1%          | 1.1%  | 1.1%  |      |  |
| Kcna1  | I/V           | 0                          | 8.3%      | 7.1%        | 2.4%  | 9.5%  | 8.2%   | 5.2%   | 4.8%   | 6.2%   | 7.7%   | 11.7%  | 9.1%  | 3.4%       | 10.1%  | 10.0% | 13.4%  | 10.5% | 8.0%       | 9.1%   | 28.9% | 22.5% | 7.0%   | 10.1%         | 19.4% | 20.0% |      |  |
|        | A             | -12                        | 41.2%     | 38.9%       | 42.1% | 50.1% | 51.8%  | 42.0%  | 42.1%  | 42.9%  | 49.7%  | 47.0%  | 45.4% | 39.9%      | 40.5%  | 41.9% | 46.9%  | 43.1% | 48.7%      | 42.2%  | 51.5% | 44.1% | 39.5%  | 43.1%         | 44.2% | 48.2% |      |  |
|        | B             | -10                        | 8.6%      | 7.3%        | 6.4%  | 11.8% | 13.1%  | 9.8%   | 7.2%   | 8.6%   | 10.6%  | 11.6%  | 9.3%  | 9.4%       | 8.4%   | 8.3%  | 11.3%  | 7.4%  | 7.3%       | 7.6%   | 12.0% | 8.8%  | 8.8%   | 9.2%          | 7.7%  | 8.2%  |      |  |
|        | C             | -6                         | 8.6%      | 5.4%        | 8.6%  | 9.2%  | 10.3%  | 8.0%   | 9.1%   | 9.0%   | 10.4%  | 10.9%  | 8.3%  | 8.0%       | 9.1%   | 8.6%  | 10.6%  | 9.6%  | 8.0%       | 9.0%   | 9.9%  | 8.4%  | 7.0%   | 7.5%          | 9.7%  | 10.6% |      |  |
|        | D             | 0                          | 30.0%     | 28.3%       | 31.3% | 33.8% | 36.7%  | 28.3%  | 29.1%  | 29.0%  | 35.8%  | 36.0%  | 34.4% | 28.6%      | 30.2%  | 29.4% | 27.1%  | 31.5% | 33.8%      | 31.5%  | 38.1% | 32.2% | 27.2%  | 33.1%         | 33.6% | 34.4% |      |  |
| Gabra3 | I/M           | 0                          | 60.2%     | 59.2%       | 37.9% | 67.8% | 67.9%  | 58.5%  | 60.5%  | 57.3%  | 65.2%  | 72.5%  | 62.5% | 57.7%      | 60.4%  | 58.6% | 61.1%  | 59.6% | 65.5%      | 61.8%  | 74.4% | 63.9% | 60.4%  | 62.4%         | 59.5% | 64.6% |      |  |
|        | Adar2         | -27                        | 50        | 2.7%        | 3.6%  | 3.0%  | 1.3%   | 3.3%   | 4.6%   | 2.6%   | 3.2%   | 2.9%   | 4.8%  | 1.9%       | 2.4%   | 1.9%  | 2.4%   | 4.5%  | 3.5%       | 3.4%   | 3.2%  | 3.5%  | 2.2%   | 2.1%          | 2.5%  | 1.4%  |      |  |
|        | -17           | -40                        | 7.2%      | 7.1%        | 5.3%  | 1.3%  | 8.0%   | 7.6%   | 5.2%   | 11.5%  | 11.9%  | 9.1%   | 3.2%  | 3.7%       | 4.1%   | 11.6% | 5.3%   | 6.7%  | 6.8%       | 9.6%   | 11.4% | 10.0% | 10.9%  | 9.5%          | 11.9% | 14.4% |      |  |
|        | -16           | -29                        | 3.2%      | 3.3%        | 1.2%  | 2.8%  | 1.5%   | 2.1%   | 1.5%   | 2.1%   | 1.5%   | 2.1%   | 1.5%  | 2.1%       | 1.5%   | 2.1%  | 1.5%   | 2.1%  | 1.5%       | 2.1%   | 1.5%  | 2.1%  | 1.5%   | 2.1%          | 1.5%  | 2.1%  |      |  |
|        | -15           | -38                        | 1.2%      | 1.9%        | 1.2%  | 6.6%  | 5.3%   | 2.1%   | 1.8%   | 4.5%   | 4.8%   | 6.4%   | 2.6%  | 2.3%       | 1.9%   | 2.5%  | 5.4%   | 1.8%  | 1.1%       | 3.9%   | 3.7%  | 9.1%  | 5.1%   | 6.8%          | 9.0%  | 12.5% |      |  |
| Fina   | Q/R           | 0                          | 3.9%      | 7.7%        | 5.6%  | 19.9% | 14.1%  | 4.7%   | 7.4%   | 6.6%   | 14.9%  | 15.7%  | 8.0%  | 5.0%       | 4.9%   | 12.2% | 15.2%  | 5.0%  | 12.6%      | 8.5%   | 14.1% | 19.6% | 21.1%  | 9.8%          | 8.8%  | 18.3% |      |  |
|        | K/R           | 15                         | 2.8%      | 2.8%        | 2.8%  | 2.8%  | 2.8%   | 2.8%   | 2.8%   | 2.8%   | 2.8%   | 2.8%   | 2.8%  | 2.8%       | 2.8%   | 2.8%  | 2.8%   | 2.8%  | 2.8%       | 2.8%   | 2.8%  | 2.8%  | 2.8%   | 2.8%          | 2.8%  | 2.8%  |      |  |
|        | Bicap         | Sa                         | -25       | 7.7%        | 9.3%  | 8.6%  | 10.5%  | 12.2%  | 7.1%   | 10.9%  | 10.1%  | 12.0%  | 10.3% | 6.9%       | 8.1%   | 9.9%  | 14.6%  | 14.1% | 7.8%       | 8.5%   | 10.4% | 13.4% | 14.7%  | 10.4%         | 10.6% | 8.7%  | 9.3% |  |
|        | Sb            | -11                        | 1.6%      | 1.6%        | 1.2%  | 2.8%  | 1.4%   | 1.3%   | 1.5%   | 2.1%   | 1.3%   | 1.8%   | 2.0%  | 1.4%       | 1.3%   | 1.2%  | 1.9%   | 2.4%  | 1.8%       | 1.1%   | 1.1%  | 1.7%  | 2.7%   | 2.5%          | 2.1%  | 2.7%  |      |  |
|        | Sr            | 5                          | 1.1%      | 1.1%        | 1.1%  | 1.1%  | 1.1%   | 1.1%   | 1.1%   | 1.1%   | 1.1%   | 1.1%   | 1.1%  | 1.1%       | 1.1%   | 1.1%  | 1.1%   | 1.1%  | 1.1%       | 1.1%   | 1.1%  | 1.1%  | 1.1%   | 1.1%          | 1.1%  | 1.1%  |      |  |
| Ednrb  | Q/R           | 0                          | 3.9%      | 7.7%        | 5.6%  | 19.9% | 14.1%  | 4.7%   | 7.4%   | 6.6%   | 14.9%  | 15.7%  | 8.0%  | 5.0%       | 4.9%   | 12.2% | 15.2%  | 5.0%  | 12.6%      | 8.5%   | 14.1% | 19.6% | 21.1%  | 9.8%          | 8.8%  | 18.3% |      |  |
|        | K/R           | 15                         | 2.8%      | 2.8%        | 2.8%  | 2.8%  | 2.8%   | 2.8%   | 2.8%   | 2.8%   | 2.8%   | 2.8%   | 2.8%  | 2.8%       | 2.8%   | 2.8%  | 2.8%   | 2.8%  | 2.8%       | 2.8%   | 2.8%  | 2.8%  | 2.8%   | 2.8%          | 2.8%  | 2.8%  |      |  |
|        | Bicap         | Sa                         | -25       | 7.7%        | 9.3%  | 8.6%  | 10.5%  | 12.2%  | 7.1%   | 10.9%  | 10.1%  | 12.0%  | 10.3% | 6.9%       | 8.1%   | 9.9%  | 14.6%  | 14.1% | 7.8%       | 8.5%   | 10.4% | 13.4% | 14.7%  | 10.4%         | 10.6% | 8.7%  | 9.3% |  |
|        | Sb            | -11                        | 1.6%      | 1.6%        | 1.2%  | 2.8%  | 1.4%   | 1.3%   | 1.5%   | 2.1%   | 1.3%   | 1.8%   | 2.0%  | 1.4%       | 1.3%   | 1.2%  | 1.9%   | 2.4%  | 1.8%       | 1.1%   | 1.1%  | 1.7%  | 2.7%   | 2.5%          | 2.1%  | 2.7%  |      |  |
|        | Sr            | 5                          | 1.1%      | 1.1%        | 1.1%  | 1.1%  | 1.1%   | 1.1%   | 1.1%   | 1.1%   | 1.1%   | 1.1%   | 1.1%  | 1.1%       | 1.1%   | 1.1%  | 1.1%   | 1.1%  | 1.1%       | 1.1%   | 1.1%  | 1.1%  | 1.1%   | 1.1%          | 1.1%  | 1.1%  |      |  |

**Supplementary Table S1:** Editing in percentage for each individual site. The identity of the sites is denoted to the left. The distance to the assumed primary editing site is indicated in column 2. Only sites displaying > 1 % editing in at least five samples are included in the figure.



| Tissue              | Grik2 | Gria2 | Gria3 | Kcna1 | Htr2c | Gabra3 | ADAR2 | Flna | Blcap | Igfbp7 | Ednrb | Cyfp2 |
|---------------------|-------|-------|-------|-------|-------|--------|-------|------|-------|--------|-------|-------|
| E23, Forebrain      | 3153  | 141   | 2266  | 2204  | 2533  | 1812   | 825   | 1923 | 1414  | 2121   | 2273  | 1976  |
| E42, Brain stem     | 5572  | 246   | 3394  | 2294  | 3776  | 2309   | 1598  | 2142 | 2075  | 2802   | 2945  | 3147  |
| E42, Cortex         | 3687  | 178   | 2197  | 1498  | 2719  | 2178   | 771   | 2097 | 1793  | 2734   | 2733  | 2469  |
| E42, Cerebellum     | 4059  | 198   | 4434  | 2282  | 4250  | 2714   | 1526  | 2334 | 1921  | 2521   | 3658  | 2024  |
| E42, Hippocampus    | 4175  | 126   | 3258  | 1794  | 2614  | 1479   | 2147  | 1538 | 1297  | 1801   | 1801  | 1464  |
| E60, Brain stem     | 5034  | 83    | 1166  | 1414  | 2045  | 1128   | 468   | 814  | 739   | 1945   | 12    | 2348  |
| E60, Cortex         | 3276  | 176   | 9610  | 2009  | 1907  | 1697   | 1456  | 3060 | 1828  | 3033   | 2633  | 1732  |
| E60, Cerebellum     | 4301  | 196   | 2890  | 2294  | 1565  | 2279   | 764   | 1637 | 1381  | 4124   | 5029  | 2751  |
| E60, Basal ganglia  | 5909  | 306   | 4767  | 3923  | 6467  | 5762   | 2790  | 4015 | 3724  | 4801   | 5161  | 3277  |
| E60, Hippocampus    | 3800  | 338   | 2165  | 2155  | 2761  | 2156   | 1338  | 2846 | 2350  | 2538   | 2396  | 2171  |
| E80, Brain stem     | 6241  | 268   | 3457  | 3056  | 5301  | 3420   | 2226  | 3921 | 2263  | 3675   | 3515  | 3801  |
| E80, Cortex         | 3789  | 90    | 154   | 1851  | 4044  | 2740   | 1015  | 2351 | 2220  | 2710   | 1928  | 1911  |
| E80, Cerebellum     | 3783  | 164   | 2472  | 1734  | 2816  | 2080   | 1720  | 2335 | 1683  | 2707   | 3060  | 2084  |
| E80, Basal ganglia  | 7284  | 337   | 2788  | 1906  | 1956  | 1475   | 1050  | 2089 | 1416  | 1828   | 2613  | 2216  |
| E100, Brain stem    | 3714  | 190   | 2724  | 2748  | 3128  | 2071   | 1519  | 2444 | 1784  | 3220   | 2569  | 2509  |
| E100, Cortex        | 5549  | 291   | 3618  | 5258  | 4891  | 3934   | 1900  | 4300 | 2602  | 3979   | 3596  | 3033  |
| E100, Cerebellum    | 3317  | 256   | 2517  | 2647  | 3778  | 2035   | 1170  | 2256 | 2627  | 6505   | 3750  | 2062  |
| E100, Basal ganglia | 5613  | 136   | 2408  | 3807  | 4321  | 2041   | 1478  | 2237 | 1124  | 3380   | 2059  | 2677  |
| E100, Hippocampus   | 7158  | 341   | 4208  | 3342  | 3576  | 2889   | 1295  | 3455 | 1607  | 5751   | 6481  | 2897  |
| E115, Brain stem    | 6603  | 190   | 2779  | 4215  | 4933  | 2502   | 1147  | 4452 | 2570  | 3995   | 4967  | 3692  |
| E115, Cortex        | 6845  | 187   | 4717  | 4133  | 8509  | 4355   | 4028  | 3859 | 4672  | 6352   | 4759  | 4216  |
| E115, Cerebellum    | 8868  | 169   | 1077  | 1656  | 2111  | 1599   | 392   | 1999 | 1886  | 2384   | 2670  | 1645  |
| E115, Basal ganglia | 10710 | 285   | 3611  | 6084  | 4839  | 3374   | 1195  | 2797 | 1611  | 2142   | 4581  | 2819  |
| E115, Hippocampus   | 4471  | 203   | 3602  | 2853  | 3622  | 3285   | 1829  | 2931 | 2910  | 3874   | 3065  | 2814  |

**Supplementary Table S3:** The number sequences analyzed for each of the twelve different amplicons, 5 tissues and 6 time points.

Grik2

AGAGAAGCTTTACCGCAAGCCCAATGGTACAAACCCAGGCGTCTTCTCCTTCTGAATCCTCTCTCCCCTGATATCTGGATGTATA  
TTCTGCTGGCTTACTTGGGTGTGAGTTGTGTGCTCTTTGTCATAGCCAGGTTTGTAGTCCCTATGAGTGGTATAACCCACACCCTTGC  
AATCCTGACTCAGACGTGGTGGAAAACAATTTTACCTTGCTAAATAGTTTCTGGTTTGGAGTTGGAGCTCTCATGCAGCAAGGTT

Gria2

AGGAAAGCTTGGTCAGCAGATTTAGCCCCTACGAGTGGCACACTGAGGAGTTCGAAGATGGAAGAGAACTCAAAGTAGTGAA  
TCAACTAATGAATTTGGGATTTTTAATAGTCTCTGGTTTTCTTGGGTGCCTTTATGCAGCAAGGATGCGATATTTCCGCAAGGTT  
GGTTACTTCCCTGCTTCAGCTTTGTGCATTTTAGGTCTCAAGTGGATATTCATGGTGTATGAATTCCTCTGAAGAAATTAGCA  
GCCGCCGACTACCTGTCCAAGCAGTACATTAAGGACAGATTTTACCATCGGCATAAGCCTGTGAAATATTTGAGCAATGTTCTT

Gria3

AGAGAAGCTTAACCATGTGATACGATGAAAGTTGGTGGAAATCTGGATTCCAAAGGCTATGGTGTGGCAACCCCTAAAGGCTC  
AGCATTAAGGTGGGTGGAATAATATAACAATATCCGTGTTGTTATAGTATTCCACCTACCCTGACTCGAGTCCT

Kcna1

AGAGAAGCTTACTGTAGGATACGGTGACATGTACCCTGTGACAATTGGAGGCAAGATCGTGGGCTCCTTGTGTGCCATCGCTGG  
TGTGCTGACAATTGCCCTGCCGTACCTGTCATTGTGTCCAATTTCAACTATTTCTACCACCGAGAACTGAGGGGGAAGAGCAG

Htr2c

AAGGAAGCTTGTCCATCATGCACCTCTGCGCTATTTGCTGGATCGGTATGTAGCAATACGTAATCCTATTGAGCATAGCCGTTT  
CAATTCACGGACTAAGGCCATCATGAAGATTGCTATTGTTTGGGCAACTCGAGTCCT

Gabra3

GAGAAAGCTTATGACGACCCTCAGTATCAGTGCCCGAACTCTCTGCCCAAAGTGGCTTATGCGACGGCCATGGACTGGTTCAT  
AGCCGTGTGCTATGCTTTTGTGTTCTCTGCGCTGATCGAGTTTCCACAGTCAACTATTTACCACCTCGAGTCCT

ADAR2

AGAGAAGCTTAAGCACACAGCACTTAACCAGTTGCAAAGACAGATGAAGGAATCCATAAATTTGCAATTTACAAGATCCTGCAA  
CGAAGGCGTTGTAAGTTACTCTTTCTGGGCACCGCAGGTTGGAGCAGCGCAGAGGTTAAGGAACTCGAGTCTC

Flna

AGGAAAGCTTATCCCTGACAGCCCTTTTGTGGTGCCCGTGGCCTCTCCGTCTGGTGACGCCCGCCGCTTACTGTTTCTAGTCTTC  
AGGAGTCAGGGCTAAAGGTCAACCAGCCAGCCTCTTTTGCAGTCAGCCTGACTCGAGCTCT

Blcap

AGGAAAGCTTATTAGTTCGGTTCCTGCAGCGGTGCCCGTGGCCTTGGCGAAGGCCCTGTCCGGCAGAGATCATGTATTGCCTC  
CAGTGGCTGCTGCCCGTCTCCTCATCCCCAAGCCCTCAACCCCGCCCTGTGGTTCAGCCACTCCATGCTCGAGCTCG

Igfbp7

AGAGAAGCTTACTGCGCGCCGGGCATGGAGTGCCTGAAGAGCCGCAAGAGGCGGAAGGGTAAAGCGGGCGCAGCAGCCGGC  
GGCCCCGGCGTAAGCGGTGTGTGCGTGTGCAAGAGCCGCTACCCGGTGTCTCGAGTCCT

Ednrb

AGAGAAGCTTTTTCTGCTTGCCACTAGCCATCACTGCATTTTTTATACCCTGATGACCTGTGAAATGCTGAGAAAGAAGAGTGG  
CATGCAAATTGCTTTAAATGATCACTTAAAGCAGAGACGGGAAGTGGCCAAAACCGTATTTTGCCTGGTCTTGTCTTTGCCCTG

Cyfp2

AGAGAAGCTTAGCAGCCCCAGGTGGTTCGGCTGTTTGGGGACATGCAAATAGAAGTGGCAAGATACATCAAGACCAGCGCTCA  
CTATGAGGAAAATAAATCTCGGTGGACGTGCACATCCTCTAGCAGCAGCCACAGTACAACATCTGCGAGCAGATGGTTCAGAT

**Supplementary Table S4:** The genomic sequence of each RT-PCR amplicon analyzed.
